# Supplementary material
Source: HighWire-hosted journal article supplement (https://thorax.bmj.com/highwire/filestream/174176/field_highwire_adjunct_files/3/Supplementary_figure3.pdf)

Supplementary Figure 3

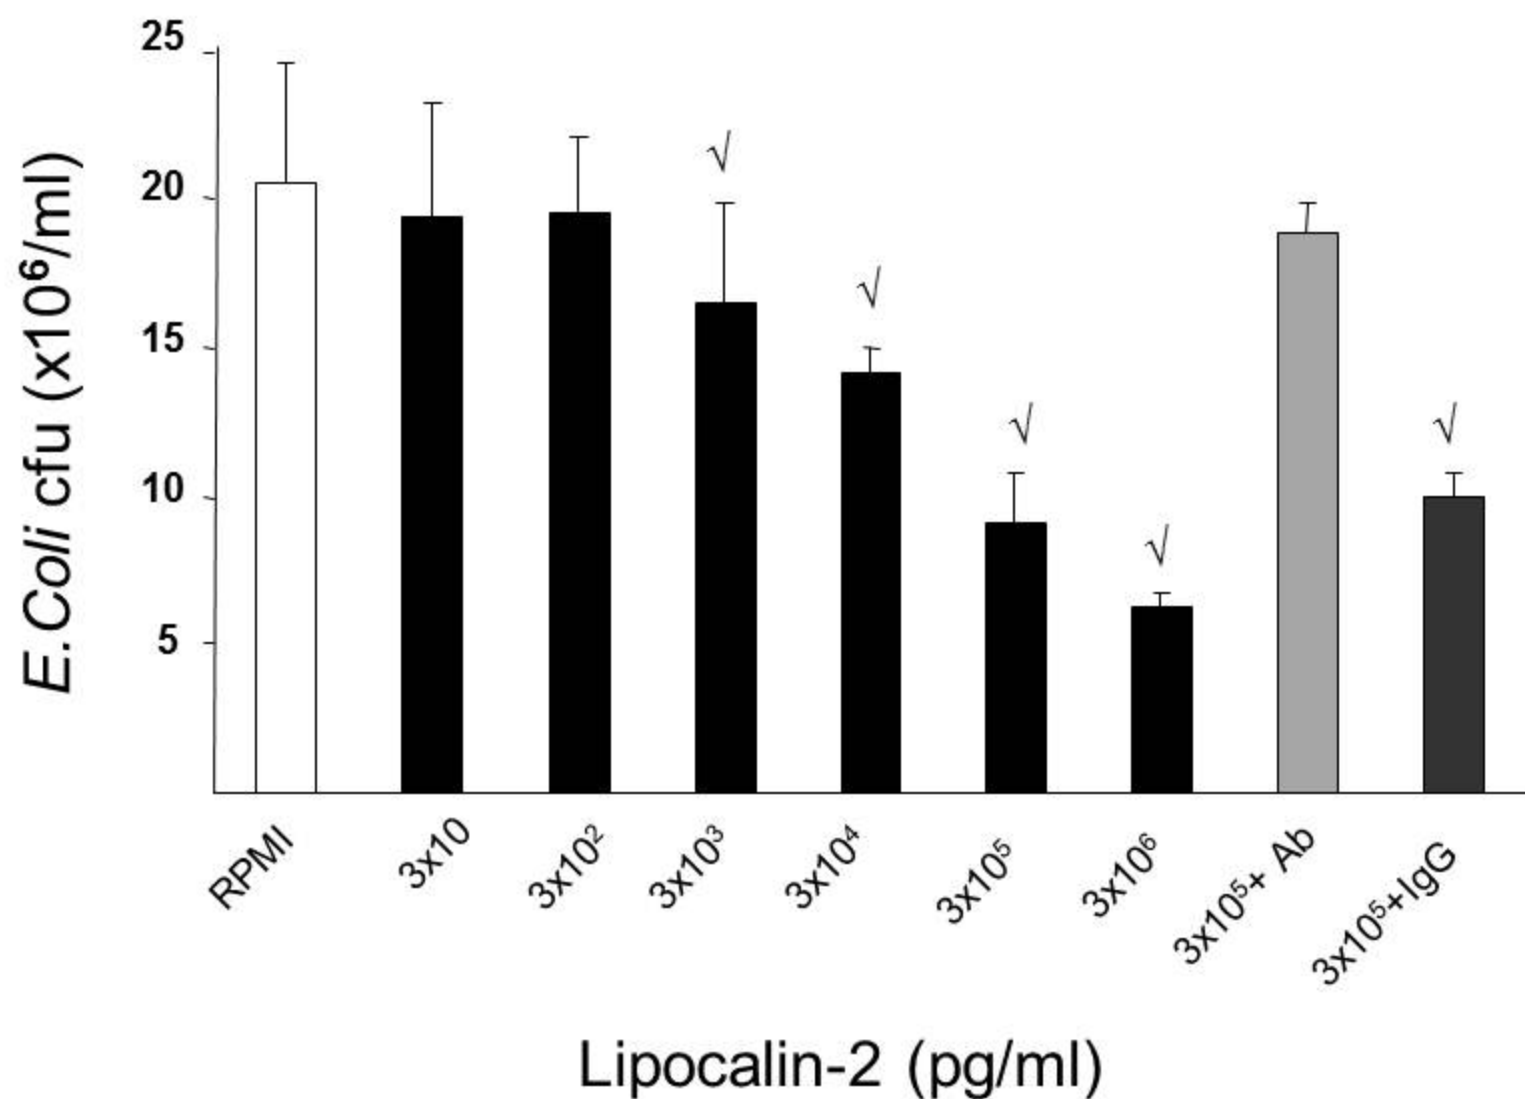

Supplement: Supplementary_figure3.pdf [file Supplementary_figure3.pdf]
